# Supplementary material for: Fabrication of a nano-structured Pt-loaded cerium oxide nanowire and its anode performance in the methanol electro-oxidation reaction
Source: Royal Society of Chemistry journal article supplement (doi:10.1039/c3ta10652g), 2013-01-01
Supplement: c3ta10652g.pdf [file c3ta10652g.pdf]

## Supporting information (SI)

### Supporting information No.1;

In the present work, the amount of Pt in the electro-catalysts is expressed by using  $\text{mgml}^{-1}$  unit. The authors showed the relationship between  $\text{mgml}^{-1}$  and wt% for explanation of Pt content in the total mass including  $\text{CeO}_x$  nanowire and conductive carbon in Table 1 for SI.

**Table 1 for SI** Relationship between wt% and  $\text{mgml}^{-1}$  for explanation of Pt content.

|                 |                            |
|-----------------|----------------------------|
| 50 wt% Pt ..... | $9.75\text{mgml}^{-1}$ Pt  |
| 30 wt% Pt ..... | $5.85\text{mgml}^{-1}$ Pt  |
| 20 wt% Pt ..... | $3.90\text{mgml}^{-1}$ Pt  |
| 10 wt% Pt ..... | $1.95\text{mgml}^{-1}$ Pt  |
| 5 wt% Pt .....  | $0.975\text{mgml}^{-1}$ Pt |
| 1 wt% Pt .....  | $0.195\text{mgml}^{-1}$ Pt |

### Supporting information No.2;

The CV data obtained from the lower amount of Pt (i.e.  $0.195\text{mgml}^{-1}$ , or 1wt%) in Pt- $\text{CeO}_x$  nanowires/C in Figure 1 for SI showed the noisy and low reliability data.

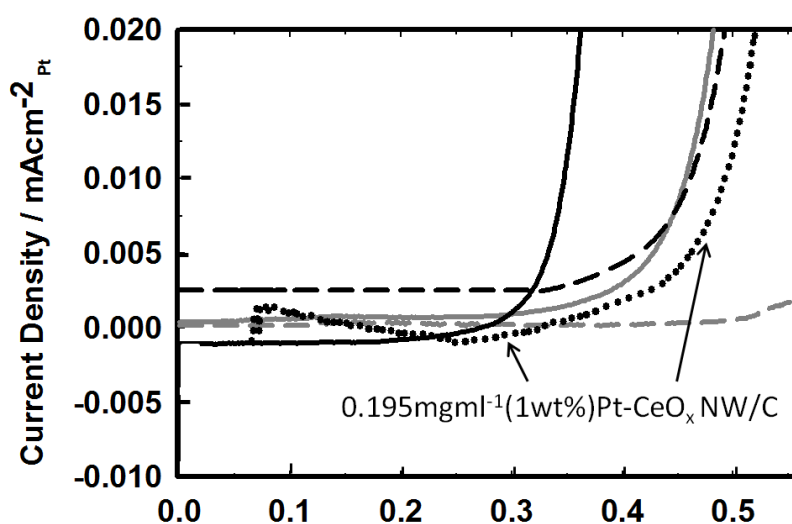

**Figure 1 for SI** Onset potential of methanol oxidation in forward sweep on  $9.75\text{mgml}^{-1}$  Pt- $\text{CeO}_x$  nanowire (NW)/C (black dashed line),  $1.95\text{mgml}^{-1}$  Pt- $\text{CeO}_x$  NW/C anode (gray solid line),  $0.975\text{mgml}^{-1}$  Pt- $\text{CeO}_x$  NW/C anode (black solid line), and commercially available  $3.90\text{mgml}^{-1}$  Pt/C anode (gray dashed line) and  $0.195\text{mgml}^{-1}$  Pt/C anode (black dotted line) at  $28^\circ\text{C}$  in the mixed solution of  $0.5\text{M}$  aqueous  $\text{H}_2\text{SO}_4$  solution and  $0.5\text{M}$  aqueous  $\text{CH}_3\text{OH}$  solution at  $1\text{mVs}^{-1}$ .
